# Supplementary material for: Anti-Inflammatory, Anti-Oxidative and Anti-Apoptotic Effects of Thymol and 24-Epibrassinolide in Zebrafish Larvae
Source: MDPI journal article supplement (doi:10.3390/antiox12061297), 2023-06-18
Supplement: s1 [file s1]

## Supplementary material

**Figure S1 - Graph with the number of neutrophils migrated to the site of injury after 4 hpi, in the different tested concentrations of THY (A) and 24-EPI (B), value was normalised according to the control group (Mean of control: THY:  $29.2 \pm 5.5$ ; 24-EPI:  $32.9 \pm 7.2$ ). Data are expressed as mean  $\pm$  SD and statistical analysis was performed using a one-way ANOVA followed by Tukey's multiple comparison test. Different letters represent statistical differences among treatment groups ( $p < 0.05$ ).**

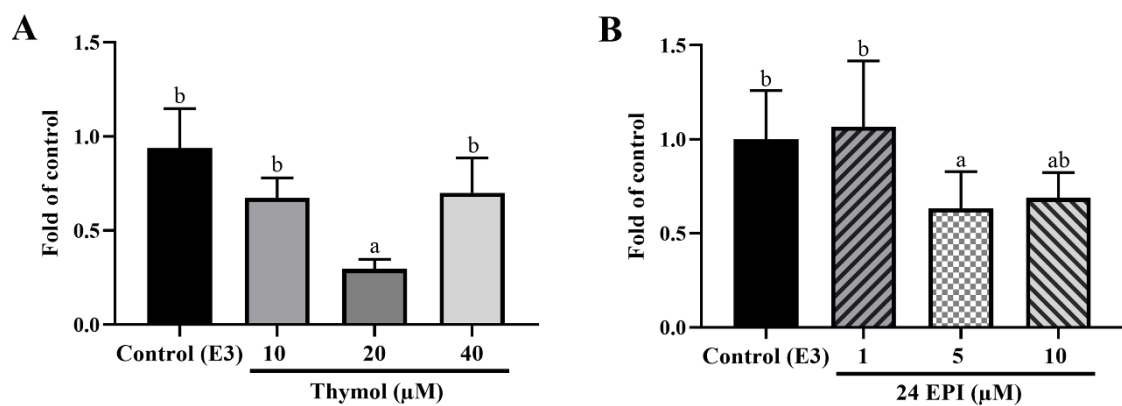

**Table S1 - Normalised biochemical markers (fold of control) evaluated in zebrafish WT larvae with 72 hpf, exposed for 4 hours to different treatments.**

| Biochemical Markers | Treatment groups |                              |                 |                        |                  |                          |                |                        | Statistical test | <i>p</i> |
|---------------------|------------------|------------------------------|-----------------|------------------------|------------------|--------------------------|----------------|------------------------|------------------|----------|
|                     | Control (E3)     | CuSO <sub>4</sub> 10 $\mu$ M | DIC 1.5 $\mu$ M | CuSO <sub>4</sub> +DIC | 24-EPI 5 $\mu$ M | CuSO <sub>4</sub> +24EPI | THY 20 $\mu$ M | CuSO <sub>4</sub> +THY |                  |          |
| <b>GST</b>          | 1.0 $\pm$ 0.1    | 0.8 $\pm$ 0.1                | 1.0 $\pm$ 0.2   | 0.9 $\pm$ 0.1          | 0.9 $\pm$ 0.1    | 0.8 $\pm$ 0.09           | 0.8 $\pm$ 0.1  | 0.8 $\pm$ 0.2          | F (7,38) = 1.122 | 0.370    |
| <b>GSH</b>          | 1.0 $\pm$ 0.1    | 0.9 $\pm$ 0.1                | 0.8 $\pm$ 0.1   | 0.9 $\pm$ 0.1          | 0.8 $\pm$ 0.1    | 0.8 $\pm$ 0.1            | 0.7 $\pm$ 0.1  | 0.7 $\pm$ 0.06         | F (7,38) = 1.610 | 0.162    |
| <b>GSSG</b>         | 1.0 $\pm$ 0.1    | 0.9 $\pm$ 0.1                | 0.6 $\pm$ 0.1   | 1.0 $\pm$ 0.2          | 0.7 $\pm$ 0.2    | 0.8 $\pm$ 0.04           | 0.9 $\pm$ 0.2  | 0.8 $\pm$ 0.2          | F (7,38) = 2.022 | 0.077    |
| <b>LPO</b>          | 1.0 $\pm$ 0.2    | 0.7 $\pm$ 0.1                | 1.1 $\pm$ 0.1   | 0.8 $\pm$ 0.4          | 1.0 $\pm$ 0.3    | 1.0 $\pm$ 0.06           | 1.0 $\pm$ 0.2  | 0.8 $\pm$ 0.4          | F (7,38) = 0.957 | 0.476    |

Data from at least five independent replicates of 50 animals each, is expressed as mean  $\pm$  SD for parametric data distribution (Mean of control: GST= 17.7  $\pm$  2 ( $\mu$ mol DNPH/min mg protein); GSH = 136.88  $\pm$  26.3 ( $\mu$ mol GSH/mg protein); GSSG = 858.5  $\pm$  375.8 ( $\mu$ mol GSSG/mg protein); LPO = 2 184  $\pm$  1 562 (mmol MDA/mg protein)). Values were normalised to the control group. Statistical analysis was performed using one-way ANOVA followed by Tukey's multiple-comparison test or Kruskal-Wallis followed by Dunn's test. Different letters indicate significant statistical differences between groups ( $p < 0.05$ ).
